# Supplementary material for: Identification of the Specific Spoilage Organism in Farmed Sturgeon (Acipenser baerii) Fillets and Its Associated Quality and Flavour Change during Ice Storage
Source: MDPI journal article supplement (doi:10.3390/foods10092021), 2021-08-28
Supplement: s1 [file s1]

## Supplementary Material

### Identification of the specific spoilage organism in farmed sturgeon (*Acipenser baerii*) fillets and its associated quality and flavour change during ice storage

**Table S1**

Volatile compounds identified in tray-packaging sturgeon fillets inoculated different SSOs, respectively, stored for 15 d on ice

| NO.       | Volatile               | RT    | Relative content (%) |                    |                    |                     |
|-----------|------------------------|-------|----------------------|--------------------|--------------------|---------------------|
|           | compound               |       | Control              | <i>Pseudomonas</i> | <i>Pseudomonas</i> | <i>Shewanella</i>   |
|           |                        |       |                      | <i>fluorescens</i> | <i>mandelii</i>    | <i>putrefaciens</i> |
|           |                        | /min  |                      |                    |                    |                     |
| Aldehydes |                        |       |                      |                    |                    |                     |
| 1         | Hexanal                | 5.73  | 2.62                 | 0.90               | 2.60               | 0.79                |
| 2         | Benzaldehyde           | 10.75 | 0.60                 | 0.67               | 1.72               | ND                  |
| 3         | Octanal                | 12.18 | 1.54                 | 0.51               | 1.10               | 0.93                |
| 4         | Nonanal                | 15.44 | 10.21                | 6.43               | 9.98               | 7.22                |
| 5         | Decanal                | 18.52 | 6.71                 | 1.93               | 5.18               | 4.52                |
| 6         | Dodecanal              | 21.09 | 0.83                 | 0.38               | 0.65               | 0.71                |
| 7         | Tetradecanal           | 25.99 | 0.38                 | 0.35               | 0.50               | 0.26                |
| 8         | Hexadecanal            | 28.40 | 0.19                 | 0.99               | 0.38               | 0.15                |
| Ketones   |                        |       |                      |                    |                    |                     |
| 9         | 1-(3,3-Dimethylbicyclo | 19.48 | ND                   | ND                 | ND                 | 6.06                |

|                           |                                    |       |       |       |       |       |
|---------------------------|------------------------------------|-------|-------|-------|-------|-------|
| [2.2.1]hept-2-yl)-ethanon |                                    |       |       |       |       |       |
| 10                        | 2-Undecanone                       | 20.76 | 0.26  | 1.54  | 0.54  | 0.34  |
| 11                        | 6,10-dimethyl-5,9-Undecadien-2-one | 23.64 | 1.30  | 0.90  | 0.78  | 0.96  |
| <b>Acids</b>              |                                    |       |       |       |       |       |
| 12                        | Nonanoic acid                      | 20.05 | 0.15  | 0.14  | 0.11  | 0.18  |
| <b>Esters</b>             |                                    |       |       |       |       |       |
| 13                        | Ethyl hexanoate                    | 12.04 | 1.23  | ND    | ND    | 0.53  |
| <b>Alcohols</b>           |                                    |       |       |       |       |       |
| 14                        | 2-Penten-1-ol                      | 4.97  | 7.04  | 4.83  | 13.88 | 3.36  |
| 15                        | Hexanol                            | 7.88  | 2.60  | 0.85  | 1.04  | ND    |
| 16                        | 1-Octen-3-ol                       | 11.43 | 4.07  | 2.30  | 5.61  | 0.88  |
| 17                        | 2-Ethyl-1-hexanol                  | 13.02 | 35.53 | 46.01 | 30.74 | 33.27 |
| 18                        | 2-hydroxycumene                    | 14.80 | 0.90  | 1.12  | 0.90  | 1.06  |
| <b>Hydrocarbons</b>       |                                    |       |       |       |       |       |
| 19                        | Azulene                            | 17.86 | 3.83  | 5.00  | 3.97  | 3.68  |
| 20                        | Tetradecane                        | 22.87 | 1.61  | 2.32  | 1.34  | 1.34  |
| 21                        | Acenaphthene                       | 24.27 | 0.61  | 0.79  | 0.39  | 0.58  |
| 22                        | Pentadecane                        | 24.45 | 1.21  | 1.74  | 1.45  | 1.84  |
| 23                        | Hexadecane                         | 25.82 | 1.57  | 1.42  | 1.67  | 1.72  |
| 24                        | 2,6,10,14-Tetramethyl-pentadecane  | 26.41 | 3.33  | 2.81  | 3.11  | 4.80  |
| 25                        | Heptadecane                        | 27.06 | 2.67  | 2.22  | 1.74  | 3.98  |
| 26                        | Octadecane                         | 28.20 | 0.79  | 0.42  | 1.07  | 1.48  |

|               |                                  |        |      |      |      |       |
|---------------|----------------------------------|--------|------|------|------|-------|
| 27            | 2,6,10,14-Tetramethyl-hexadecane | 28.28  | 0.36 | 0.18 | 0.59 | 0.70  |
| 28            | 2-Methyl-naphthalene             | 20.85  | 2.28 | 3.71 | 1.95 | 2.38  |
| 29            | 1-Methyl-naphthalene             | 21.18  | 0.96 | 1.60 | 0.69 | 1.01  |
| 30            | 1,3-Dimethyl-naphthalene         | 23.232 | 0.55 | 1.04 | 0.41 | 0.63  |
| 31            | 1,8-Dimethyl-naphthalene         | 23.31  | 0.28 | 0.44 | 0.26 | 0.28  |
| <b>Others</b> |                                  |        |      |      |      |       |
| 32            | 1,3-Dichloro-benzene             | 12.50  | 1.38 | 1.86 | 2.39 | 1.77  |
| 33            | Benzothiazole                    | 19.06  | 0.98 | 1.29 | 1.50 | 0.81  |
| 34            | Butylated hydroxytoluene         | 24.50  | 1.43 | 1.86 | 1.76 | 11.78 |
| 35            | Tetramethyl pyrazine             | 14.75  | ND   | 1.45 | ND   | ND    |

ND: not detected; RT: retention time

The numbers of the volatile compounds in the table corresponded to the peak numbers in Figure 4(A、 B、 C、 D).
